# Supplementary material for: Neuropsychological evidence of multi-domain network hubs in the human thalamus
Source: eLife. 2021 Oct 8;10:e69480. doi: 10.7554/eLife.69480 (PMC8526062; doi:10.7554/eLife.69480)
Supplement: Supplementary file 1. [file elife-69480-supp1.xlsx]

## Sheet: Table1
						Supplementary Table 1 Demographic data for all patients
						Group	N	Age	Sex	Handedness	Education (years)	VIQ	PIQ	FSIQ	Lesion Laterality	Total Lesion Size in ml
						Thalamus patients	20	55.8(13.94)	7F/13M	18R/2Mi	12.9(2.15)	100.61(10.21)	101.3(12.14)	100.8(8.3)	2B/12L/6R	1364(1212)
						Comaprison patients	21	52.66(11.51)	13F/8M	19R/2Mi	12.9(2.57)	100.5(10.3)	101(10.8)	100.8(10.5)	1B/7R/13L	1334(732)
						Extended Comparison patients	145	50.83(13.98)	78F/67M	130R/11L/4Mi	13.85(2.67)	100.11(11.2)	100.77(10.5)	100.9(11)	23B/47R/75L	28269(28750)
						Demongraphic data from all three groups of patients, standard deviation provided in paranthesis.
