# Supplementary figures and images for: Neuropsychological evidence of multi-domain network hubs in the human thalamus
Source: eLife journal article supplement (doi:10.7554/elife.69480), 2021-10-06

Patients with  
multi-domain  
impairment

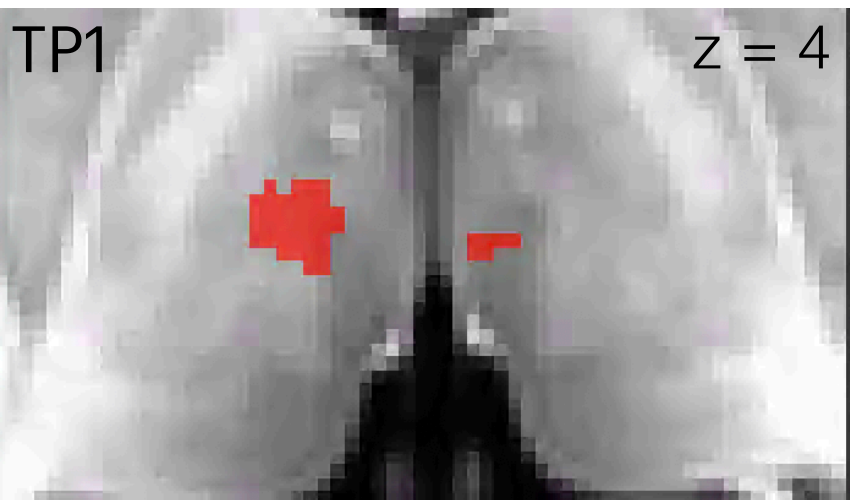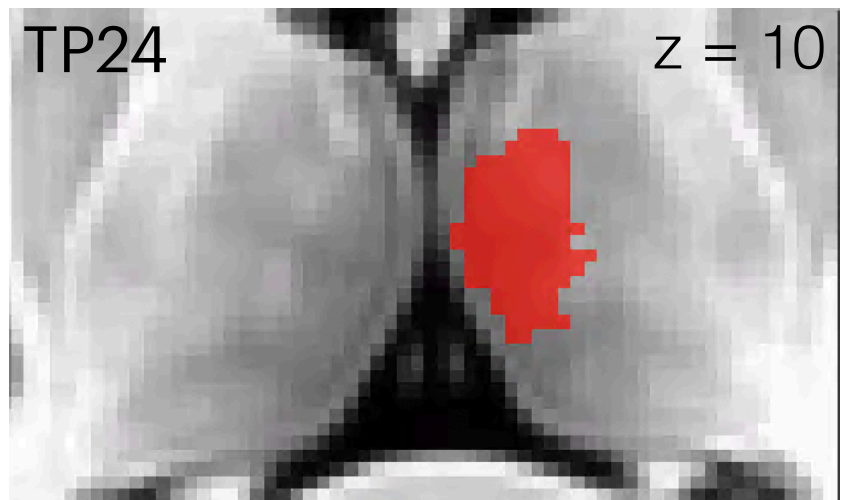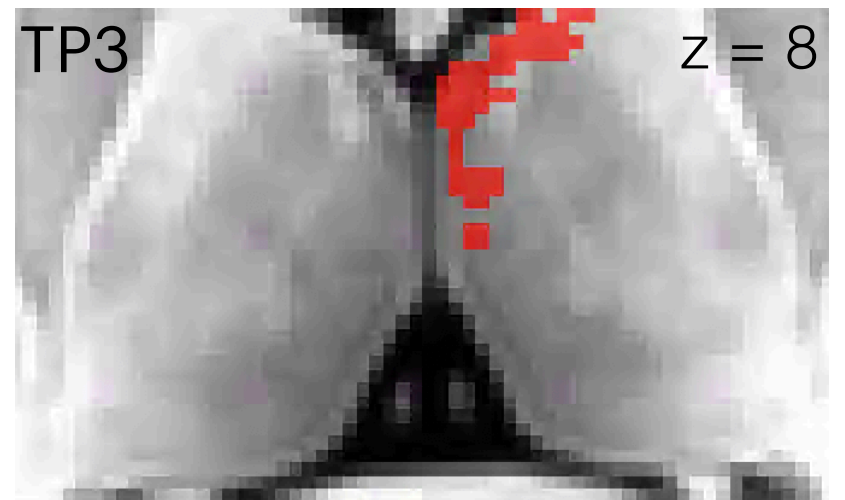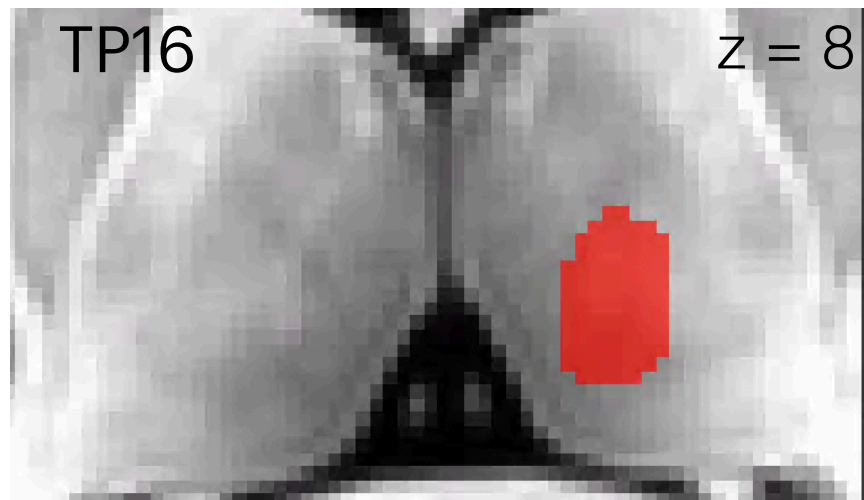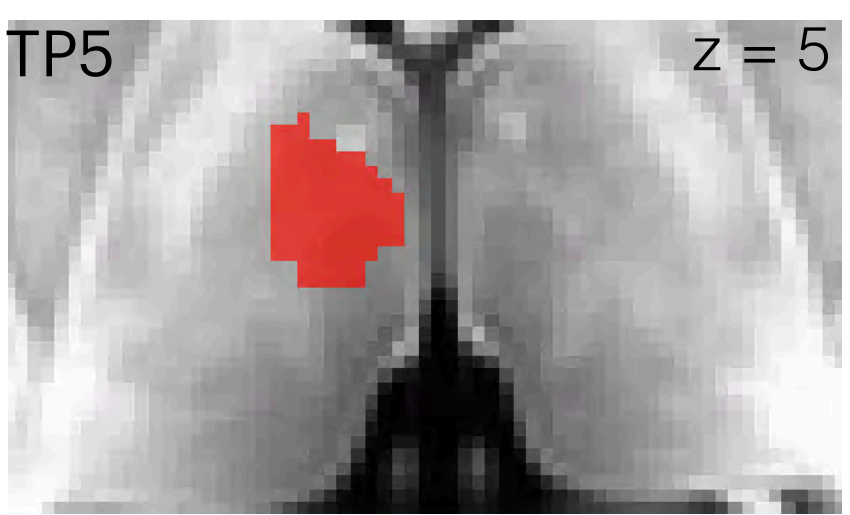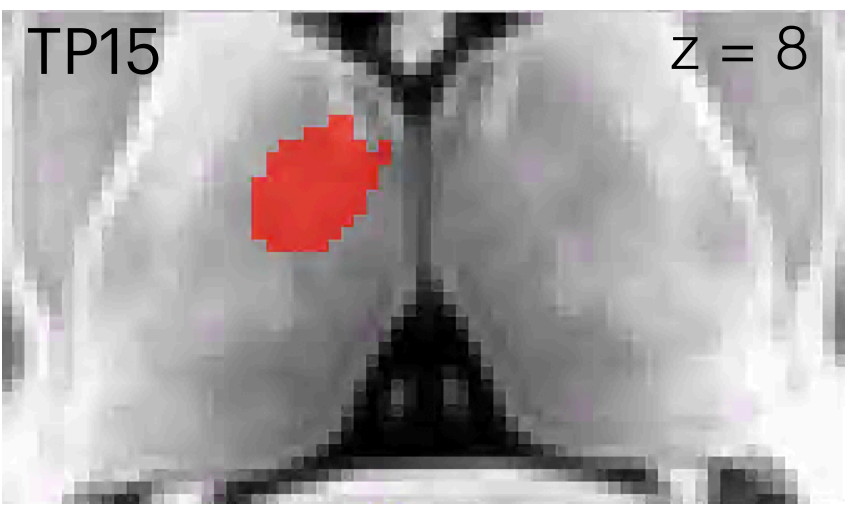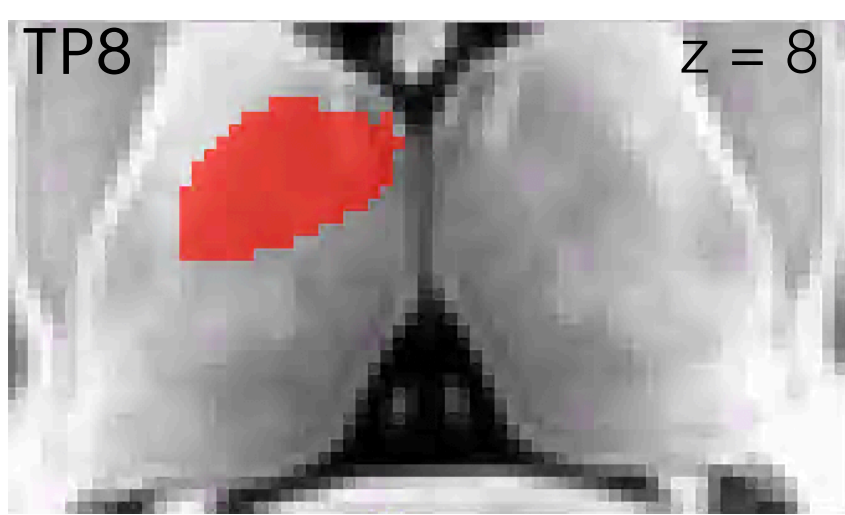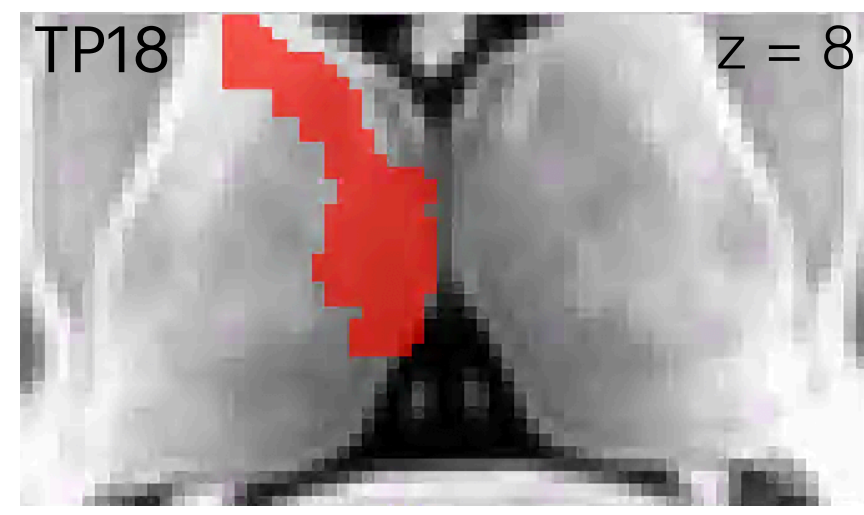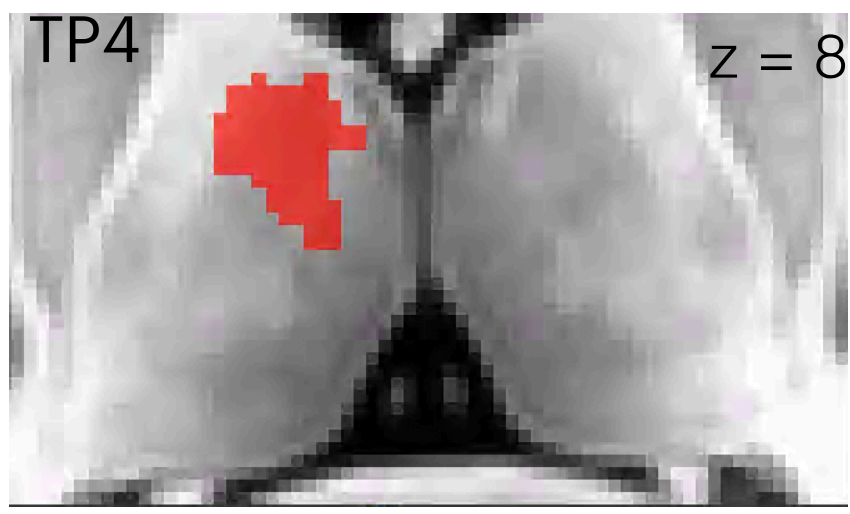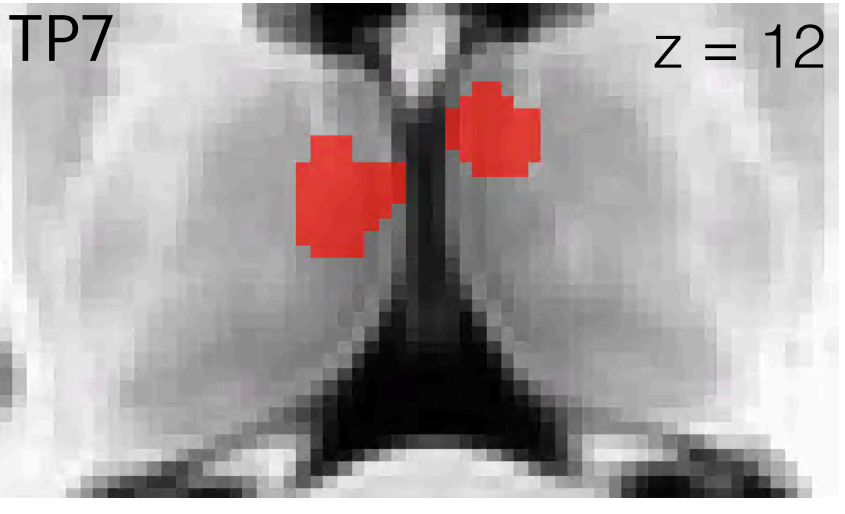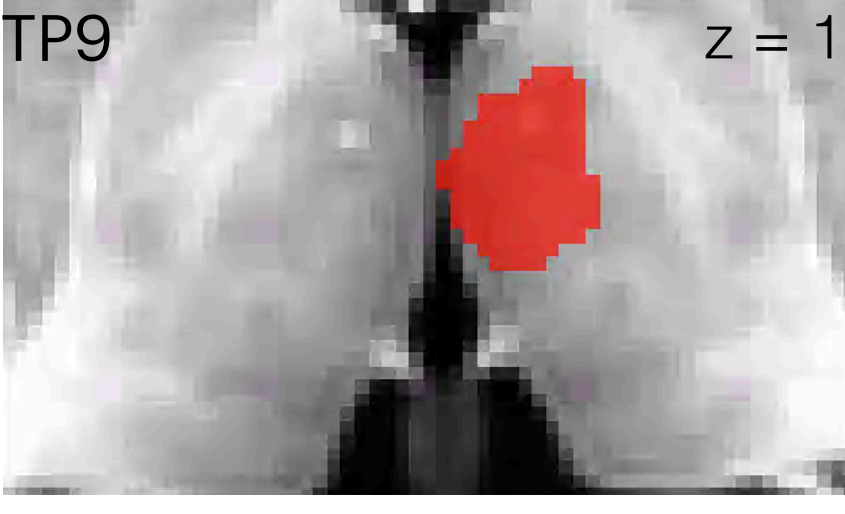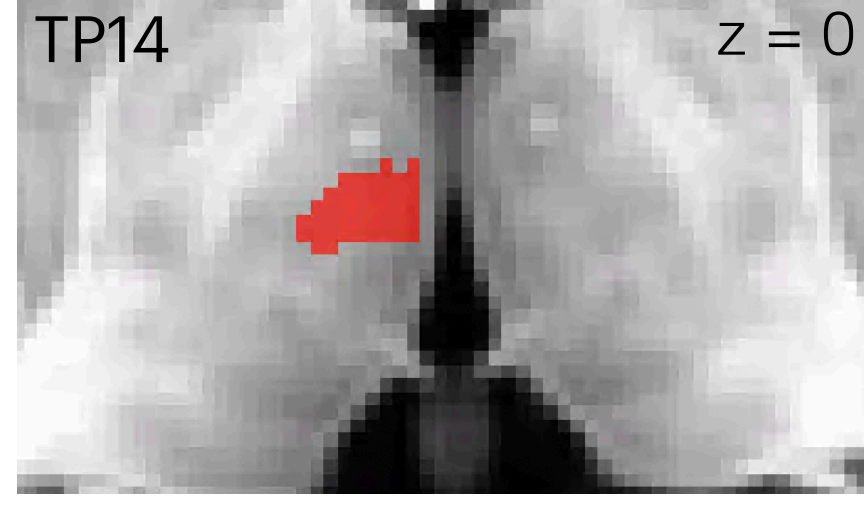

Patients without  
multi-domain  
impairment

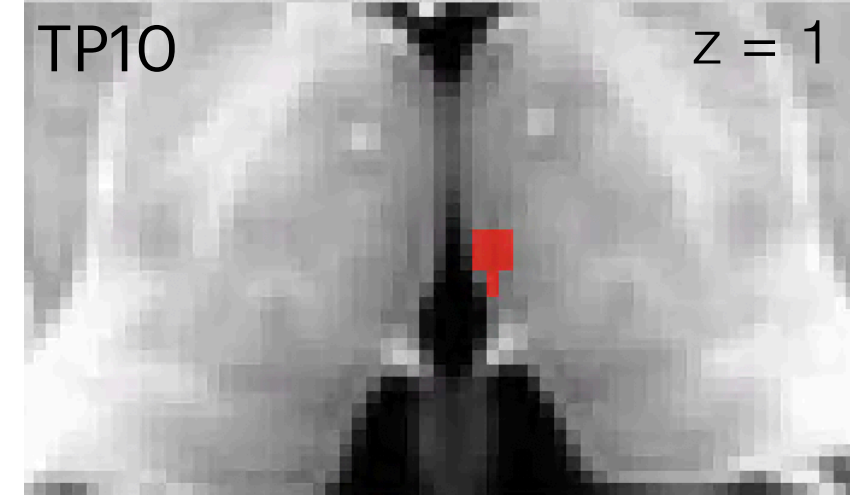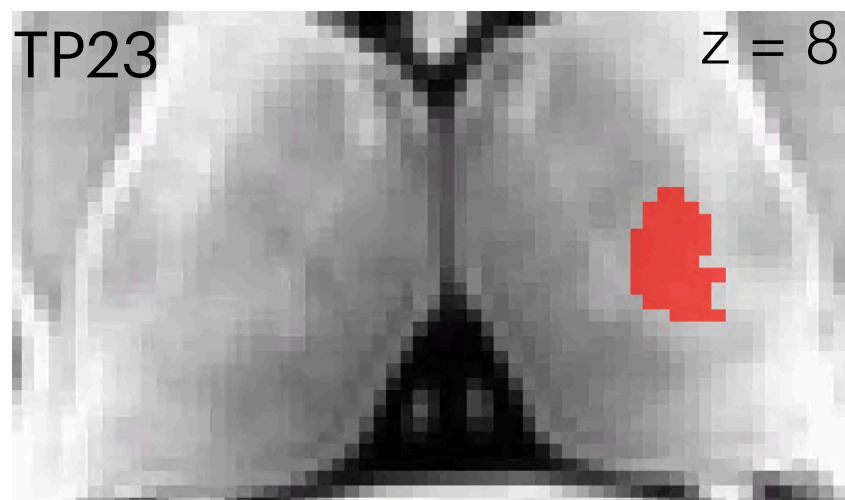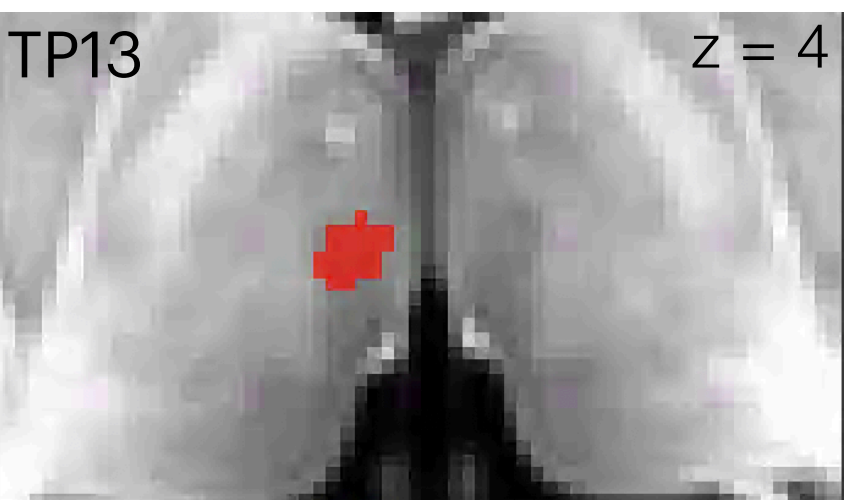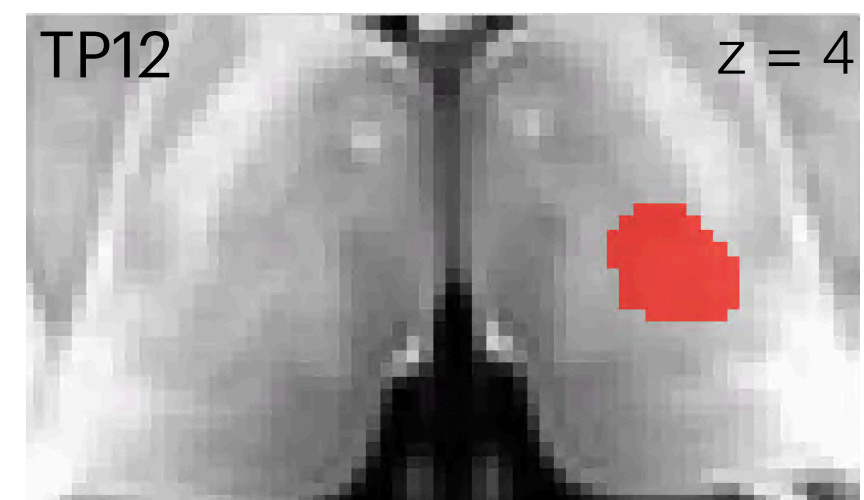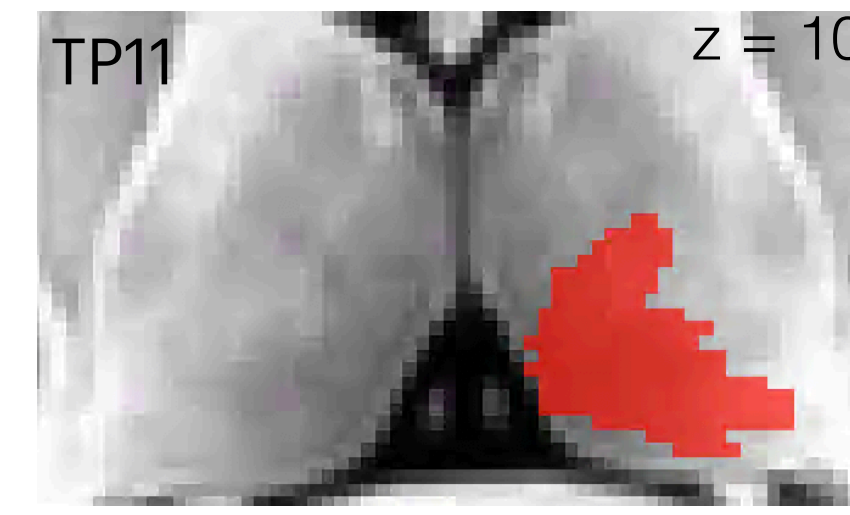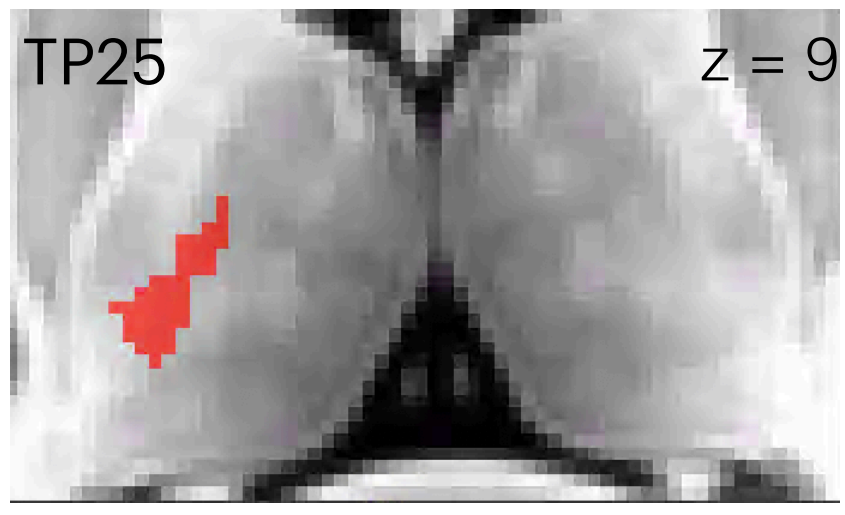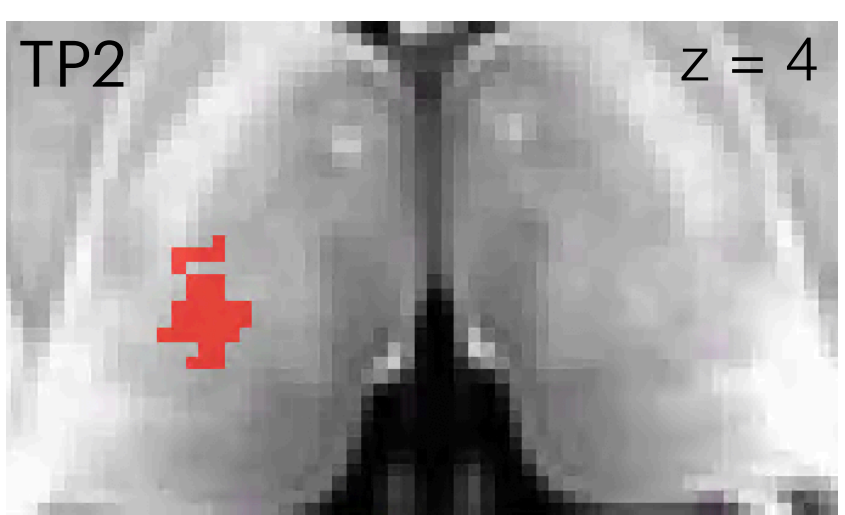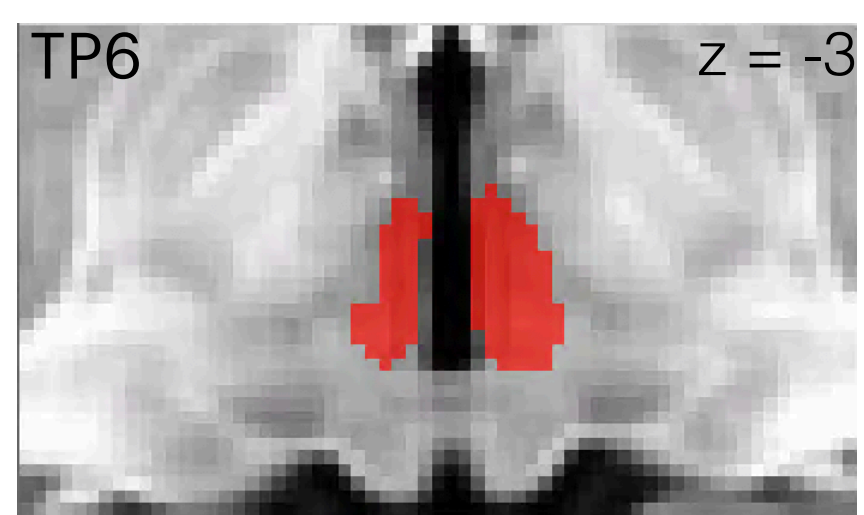

Supplement: supp [file elife-69480-supp-v1.zip]

$z = -20$

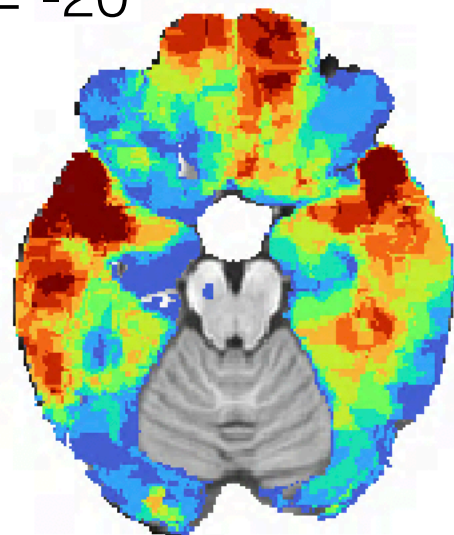

$z = -10$

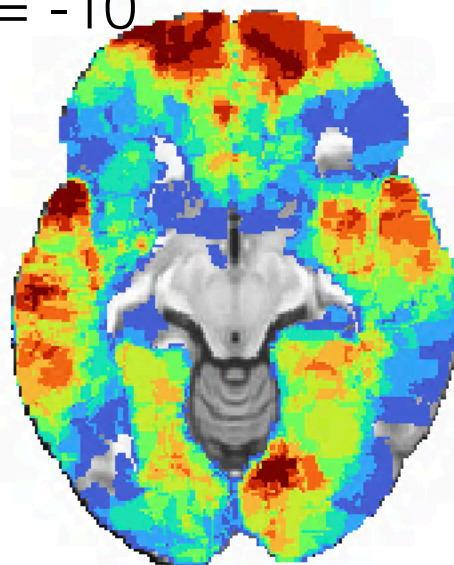

$z = 0$

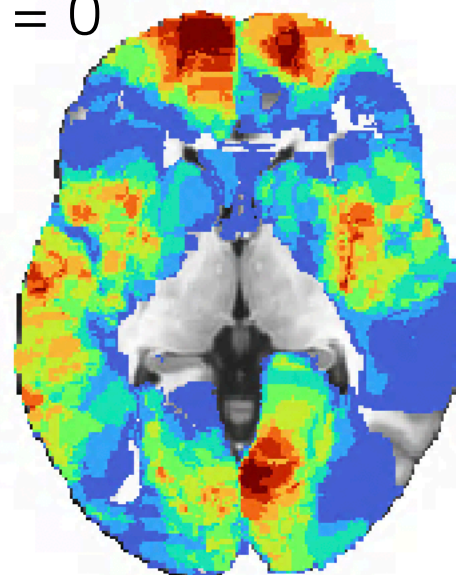

$z = 10$

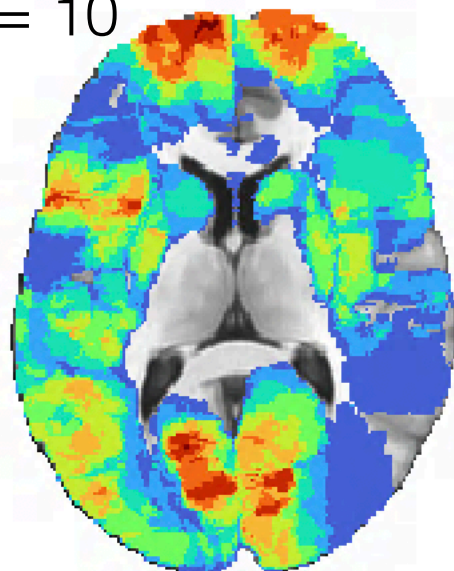

$z = 20$

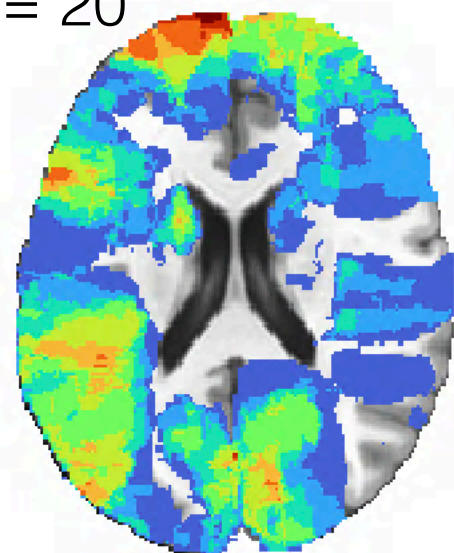

$z = 30$

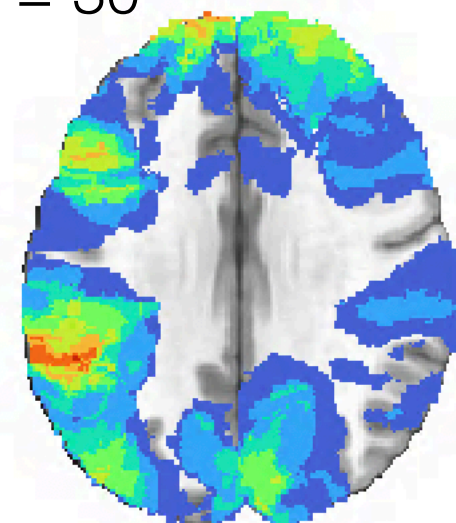

Number of  
patients

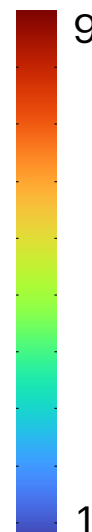

$z = 40$

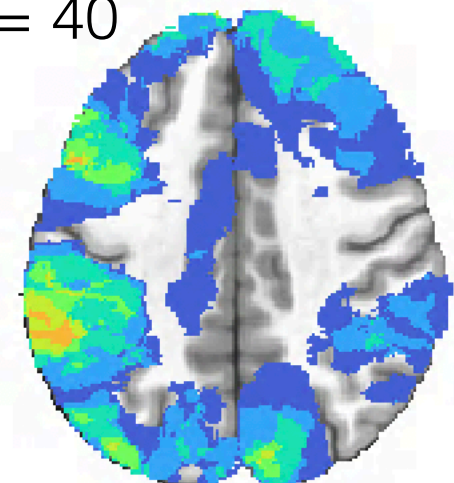

$z = 50$

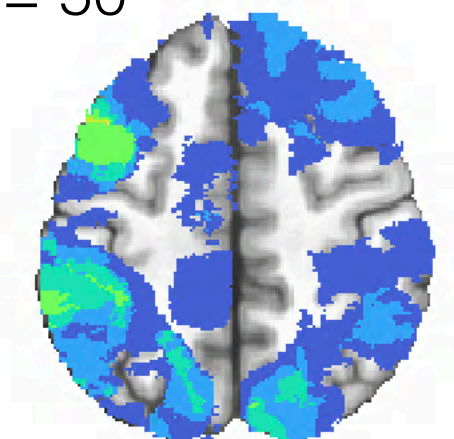

$z = 60$

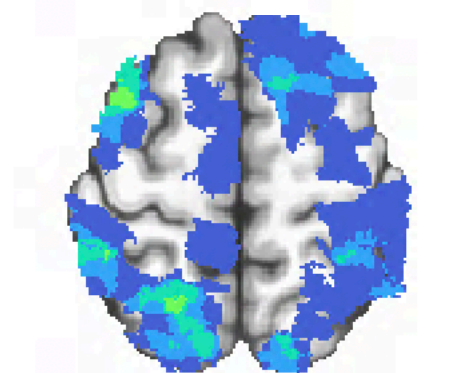

Supplement: supp [file elife-69480-supp-v1.zip]
